# Supplementary material for: SUDMEX CONN: The Mexican MRI dataset of patients with cocaine use disorder
Source: medRxiv preprint, doi:10.1101/2021.09.03.21263048, version 1 (2021-09-07)
Supplement: Supplementary Material 1 [file 263048_file02.docx]

**Supplementary 1**

For the manuscript:

**“The Mexican public MRI dataset of patients with cocaine use disorder”**

| **Supplementary 1. Study criteria.** |
| --- |
| **Inclusion**   - Minimum age of 18 years and maximum of 50 years old. - Cocaine use for at least 1 year, with current average use of at least 3 times a week, with periods of continuous abstinence of less than one month during the last year. - Desire to participate and agree to the informed consent. |
| **Exclusion**   - First-degree personal or family history of any clinically defined neurological disorder. - Any electronic or metal implants or device (i.e., aneurysm clips, shunts, stimulators, cochlear implants, or electrodes). - Splinters of metal or metal projectiles to the head or body. - Current use of any investigational drug or of any medicine with anti- or pro-convulsive action such as tricyclic antidepressants or neuroleptics, unless prescribed for craving symptoms. - History of schizophrenia, bipolar disorder, mania, or hypomania. - History of any heart condition currently under medical care (i.e., myocardial infarction, angina pectoris, congestive heart failure, etc.) - Women with reproductive potential not using an acceptable form of contraception, as well as pregnant or lactating women. - Current dependence (by DSM-IV criteria) on substances other than cocaine and / or nicotine (cocaine use disorder). - Claustrophobia. |
| **Elimination**   - Expressed desire to stop participating. - Those who presented abnormal radiological findings warranting clinical attention outside the study to ensure the health of the participant. - The appearance of psychotic symptoms related to addictive disorder. |
